# Supplementary material for: Clinical and pathological characteristics associated with the presence of the IS6110 Mycobacterim tuberculosis transposon in neoplastic cells from non-small cell lung cancer patients
Source: PubMed Central journal article supplement (PMC8828834; doi:10.1038/s41598-022-05749-z), 2022-02-09
Supplement: 41598_2022_5749_MOESM1_ESM.pdf [file 41598_2022_5749_MOESM1_ESM.pdf]

**Supplementary Table 1. Mapped reads from NGS sequences.**

| <b>Accession Number</b> | <b>Genome</b>                                       | <b>Genome Length</b> | <b>MappedReads-TB31</b> | <b>MappedReads-TB34</b> |
|-------------------------|-----------------------------------------------------|----------------------|-------------------------|-------------------------|
| CP001658.1              | Mycobacterium tuberculosis KZN 1435                 | 4398250              | 5675                    | 4364                    |
| CP004886.1              | Mycobacterium tuberculosis str. Haarlem/NITR202     | 4404786              | 2758                    | 3399                    |
| CP003233.1              | Mycobacterium tuberculosis RGTB327                  | 4380119              | 1378                    | 891                     |
| CP003248.2              | Mycobacterium tuberculosis H37Rv                    | 4411709              | 283                     | 55                      |
| AE000516.2              | Mycobacterium tuberculosis CDC1551                  | 4403837              | 244                     | 263                     |
| CP005386.1              | Mycobacterium tuberculosis CAS/NITR204              | 4392876              | 224                     | 209                     |
| HE608151.1              | Mycobacterium tuberculosis UT205                    | 4418088              | 205                     | 47                      |
| CP002884.1              | Mycobacterium tuberculosis CCDC5079                 | 4414325              | 200                     | 47                      |
| CP000611.1              | Mycobacterium tuberculosis H37Ra                    | 4419977              | 195                     | 249                     |
| CP001642.1              | Mycobacterium tuberculosis CCDC5180                 | 4405981              | 155                     | 30                      |
| AL123456.3              | Mycobacterium tuberculosis H37Rv                    | 4411532              | 120                     | 71                      |
| CP005082.1              | Mycobacterium tuberculosis str. Beijing/NITR203     | 4411128              | 97                      | 51                      |
| CP006578.1              | Mycobacterium tuberculosis EAI5                     | 4391174              | 85                      | 69                      |
| CP005387.1              | Mycobacterium tuberculosis EAI5/NITR206             | 4390306              | 83                      | 100                     |
| CP001641.1              | Mycobacterium tuberculosis CCDC5079                 | 4398812              | 72                      | 43                      |
| CP002992.1              | Mycobacterium tuberculosis CTRI-2                   | 4398525              | 69                      | 40                      |
| AP012340.1              | Mycobacterium tuberculosis str. Erdman = ATCC 35801 | 4392353              | 68                      | 98                      |

|            |                                         |         |    |    |
|------------|-----------------------------------------|---------|----|----|
| CP001976.1 | Mycobacterium tuberculosis KZN 605      | 4399120 | 66 | 27 |
| CP001662.1 | Mycobacterium tuberculosis KZN 4207     | 4394985 | 56 | 36 |
| CP001664.1 | Mycobacterium tuberculosis str. Haarlem | 4408224 | 55 | 33 |
| CP003234.1 | Mycobacterium tuberculosis RGTB423      | 4406587 | 42 | 31 |
| CP000717.1 | Mycobacterium tuberculosis F11          | 4424435 | 40 | 21 |
| HE663067.1 | Mycobacterium tuberculosis 7199-99      | 4421197 | 21 | 26 |
